# Supplementary material for: Potential of Phosphorus Solubilizing Purple Nonsulfur Bacteria Isolated from Acid Sulfate Soil in Improving Soil Property, Nutrient Uptake, and Yield of Pineapple (Ananas comosus L. Merrill) under Acidic Stress
Source: Hindawi journal article supplement (doi:10.1155/2022/8693479), 2022-11-26
Supplement: f1 [file 8693479.f1.docx]

Table 1. Effects of added liquid biofertilizers containing P solubilizing purple non-sulfur bacteria and phosphorus fertilizer levels on characteristics of acid sulfate subsoil (20 – 40 cm) cultivated pineapple

| Factor | | pHH2O | pHKCl | EC | NH4+ | Ptotal | Pavailable | Fe-P | Al-P | Ca-P |
| --- | --- | --- | --- | --- | --- | --- | --- | --- | --- | --- |
| - | - | mS cm-1 | mg kg-1 | % | mg kg-1 | mg kg-1 | mg kg-1 | mg kg-1 |
| (A) Biofertilizers (Initial cell density 108 cells mL-1) | None | 2.76 | 2.75 | 1.32 | 49.1d | 0.023 | 36.1 | 142.9a | 25.2 | 17.2a |
| W48 | 2.95 | 2.91 | 0.74 | 55.5c | 0.023 | 33.9 | 110.9b | 27.7 | 17.2a |
| W42 | 2.81 | 2.86 | 1.04 | 60.7b | 0.021 | 30.8 | 133.9a | 19.7 | 17.3a |
| W48 + W42 | 2.73 | 2.83 | 1.66 | 65.5a | 0.025 | 33.4 | 110.7b | 24.4 | 14.6b |
| (B) Phosphorus fertilizer levels (%) | 0 | 2.79 | 2.79 | 1.69 | 52.8c | 0.021 | 29.9 | 104.4c | 24.5 | 15.9 |
| 50 | 2.74 | 2.79 | 1.30 | 51.7c | 0.023 | 29.6 | 113.9c | 20.1 | 18.4 |
| 75 | 2.85 | 2.89 | 0.94 | 59.6b | 0.023 | 36.2 | 134.0b | 25.0 | 15.8 |
| 100 | 2.87 | 2.88 | 0.83 | 66.8a | 0.026 | 38.5 | 146.2a | 27.4 | 16.1 |
| F (A) | | ns | ns | ns | * | ns | ns | * | ns | * |
| F (B) | | ns | ns | ns | * | ns | ns | * | ns | ns |
| F (A x B) | | ns | ns | ns | * | * | ns | * | ns | * |
| C.V. (%) | | 14.4 | 7.14 | 26.4 | 11.7 | 25.3 | 11.3 | 11.7 | 26.2 | 18.2 |

*Numbers in each column with the same following letter are insignificantly different from each other; ns: Not significant difference; *: Significant difference at 5%; None: None added biofertilizers; W48: Rhodobacter sphaeroides W48; W42: R. sphaeroides W42; W48 + W42: A mixture of R. sphaeroides W48 and R. sphaeroides W42; EC: Electrical conductivity.*

Table 2. Effects of added liquid biofertilizers containing P solubilizing purple non-sulfur bacteria and phosphorus fertilizer levels on the total P uptake of pineapple cultivated in acid sulfate soil

| (A) Biofertilizers (Initial cell density 108 cells mL-1) | (B) Phosphorus fertilizer levels (%) | | | | Mean (B) |
| --- | --- | --- | --- | --- | --- |
| 0 | 50 | 75 | 100 |
| None | 9.4 | 15.6 | 22.2 | 26.6 | 18.4d |
| W48 | 9.0 | 21.4 | 27.9 | 31.9 | 22.5c |
| W42 | 9.6 | 26.1 | 28.8 | 34.5 | 24.7b |
| W48 + W42 | 13.7 | 23.6 | 31.5 | 38.3 | 26.8a |
| Mean (A) | 10.4d | 21.7c | 27.6b | 32.8a |  |
| F (A) | * | | | |  |
| F (B) | * | | | |  |
| F (A*B) | * | | | |  |
| *Numbers in each column with the same following letters are insignificantly different from each other; ns: Not significant difference; *: Significant difference at 5%; None: None added biofertilizers; W48: Rhodobacter sphaeroides W48; W42: R. sphaeroides W42; W48 + W42: A mixture of R. sphaeroides W48 and R. sphaeroides W42.* | | | | | |

Table 3: Interactions of added liquid biofertilizers containing P solubilizing purple non-sulfur bacteria and phosphorus fertilizer levels on pineapple yield, total nitrogen uptake, total phosphorus uptake in pineapple cultivated in acid sulfate soil

| No. | Treatments | Pineapple fruit yield (t ha-1) | Total nitrogen uptake (kg ha-1) | Total phosphorus uptake (kg ha-1) |
| --- | --- | --- | --- | --- |
| 1 | 0% P | 13.4i | 143.5g | 9.4h |
| 2 | 50% P | 15.9fg | 174.8f | 15.6g |
| 3 | 75% P | 20.1d | 211.2e | 22.2f |
| 4 | 100% P | 19.8d | 209.7e | 26.6d |
| 5 | W48 + 0% P | 15.0h | 170.6f | 9.0h |
| 6 | W48 + 50% P | 19.5d | 210.1e | 21.4f |
| 7 | W48 + 75% P | 21.6abc | 227.9de | 27.9d |
| 8 | W48 + 100% P | 22.0a | 248.5bcd | 31.9c |
| 9 | W42 + 0% P | 16.6f | 174.4f | 9.6h |
| 10 | W42 + 50% P | 18.2e | 239.0cd | 26.1de |
| 11 | W42 + 75% P | 21.0c | 253.8bc | 28.8d |
| 12 | W42 + 100% P | 21.1bc | 271.4ab | 34.5b |
| 13 | W48 + W42 + 0% P | 15.4gh | 177.8f | 13.7g |
| 14 | W48 + W42 + 50% P | 18.5e | 210.1e | 23.6ef |
| 15 | W48 + W42 + 75% P | 22.2a | 269.2ab | 31.5c |
| 16 | W48 + W42 + 100% P | 21.8ab | 280.4a | 38.3a |
| F | | * | * | * |
| C.V. (%) | | 2.69 | 6.83 | 7.89 |

*Numbers in each column with the same following letters are insignificantly different from each other; ns: Not significant difference; *: Significant difference at 5%; W48: Rhodobacter sphaeroides W48; W42: R. sphaeroides W42; W48 + W42: A mixture of R. sphaeroides W48 and R. sphaeroides W42.*

Table 4. Effects of added liquid biofertilizers containing P solubilizing purple non-sulfur bacteria and phosphorus fertilizer levels on the nitrogen content in parts of pineapple cultivated in acid sulfate soil

| Factor | | Crown | Flesh | Core | Shell | Slip, stem shoot and sucker | Peduncle (stem) | Butt (Stem with leaves stripped off) | Leaves |
| --- | --- | --- | --- | --- | --- | --- | --- | --- | --- |
| % | | | | | | | |
| (A) Biofertilizers (Initial cell density 108 cells mL-1) | None | 1.255c | 1.176 | 0.857b | 1.090 | 2.281 | 1.514c | 1.816b | 2.372 |
| W48 | 1.387ab | 1.177 | 0.914a | 1.066 | 2.351 | 1.841ab | 2.252a | 2.411 |
| W42 | 1.399a | 1.219 | 0.949a | 1.117 | 2.360 | 1.766b | 2.358a | 2.455 |
| W48 + W42 | 1.334b | 1.204 | 0.955a | 1.101 | 2.391 | 1.908a | 2.365a | 2.431 |
| (B) Phosphorus fertilizer levels (%) | 0 | 1.234c | 1.074b | 0.861b | 1.025b | 2.088c | 1.519c | 2.033b | 2.345b |
| 50 | 1.417a | 1.237a | 0.926a | 1.098a | 2.323b | 1.789b | 2.203a | 2.443ab |
| 75 | 1.376ab | 1.229a | 0.954a | 1.139a | 2.412b | 1.808b | 2.240a | 2.469a |
| 100 | 1.348b | 1.237a | 0.934a | 1.112a | 2.558a | 1.913a | 2.315a | 2.411ab |
| F (A) | | * | ns | * | ns | ns | * | * | ns |
| F (B) | | * | * | * | * | * | * | * | ns |
| F (A x B) | | * | ns | ns | ns | ns | * | * | ns |
| C.V. (%) | | 6.23 | 7.49 | 7.69 | 7.08 | 7.26 | 6.24 | 7.19 | 5.55 |

*Numbers in each column with the same following letters are insignificantly different from each other; ns: Not significant difference; *: Significant difference at 5%; None: None added biofertilizers; W48: Rhodobacter sphaeroides W48; W42: R. sphaeroides W42; W48 + W42: A mixture of R. sphaeroides W48 and R. sphaeroides W42.*

|  |
| --- |
| Figure 1. Effects of added liquid biofertilizers containing P solubilizing purple non-sulfur bacteria and phosphorus fertilizer levels on the total nitrogen uptake of pineapple cultivated in acid sulfate soil |

*Bars with the same lower letters were insignificantly different. Treatments were statistically different at 5%; W48: Rhodobacter sphaeroides W48; W42: R. sphaeroides W42; W48 + W42: A mixture of R. sphaeroides W48 and R. sphaeroides W42.*
